# Supplementary material for: Structure and bifunctional electrocatalytic activity of a novel 3D framework based on dimeric monocopper-substituted polyoxoanions as ten-connected linkages
Source: Royal Society of Chemistry journal article supplement (doi:10.1039/c3ra00018d), 2013-01-01
Supplement: c3ra00018d.pdf [file c3ra00018d.pdf]

Electric Supplemental Information for:

**Structure and Bifunctional Electrocatalytic Activity of A Novel 3D Framework Based on Dimeric Monocopper-Substituted Polyoxoanions as Ten-connected linkages †**

**Shaobin Li, Wei Zhu, Huiyuan Ma\*, Haijun Pang\*, Heng Liu and Tingting Yu**

**Table of contents:**

1. **Table S1** Summarization of known hybrids based type II dimers.
2. **Table S2** Selected bond lengths [Å] and bond angles [°] for compound **1**.
3. **Fig. S1** Schematic view of  $[\text{Cu}(\text{en})_2]^{2+}$  complex as a 2-connected node and  $(\text{PW}_{11}\text{Cu})_2$  dimer as a 10-connected node.
4. **Chart S1** Structures of dap and en molecules.
5. **Fig. S2** The IR spectrum of **1**
6. **Fig. S3** The simulative (black) and experimental (red) PXRD patterns of compound **1**.
7. **Fig. S4** TG curve of compound **1**
8. **Fig. S5** Cyclic voltammogram of **1**-CPE
9. **Fig. S6** Oxidation of AA and DA at **1**-CPE in HAc-NaAc buffer solution in the potential range of 0.0 – 0.7 V.

**Table S1** Summarization of known hybrids based type II dimers

| Compounds                                                                                                              | Connection number of the dimers | Dimension of structures | References |
|------------------------------------------------------------------------------------------------------------------------|---------------------------------|-------------------------|------------|
| $[\{\gamma\text{-SiTi}_2\text{W}_{10}\text{O}_{36}(\text{OH})_2\}_2(\mu\text{-O})_2]^{8-}$                             | 0                               | 0D                      | 24d        |
| $[\{\gamma\text{-SiTi}_2\text{W}_{10}\text{O}_{36}(\text{OMe})_2\}_2(\mu\text{-O})_2]^{8-}$                            | 0                               | 0D                      | 24d        |
| $\text{A-}\alpha\text{-}[(\text{SiNb}_3\text{W}_9\text{O}_{38})_2(\mu\text{-O})_2]^{10-}$                              | 0                               | 0D                      | 24e        |
| $[\text{Cu}(\text{dap})_2]_2\{[\text{Cu}(\text{dap})_2]_2[\text{Cu}(\text{dap})_2][\text{PCuW}_{11}\text{O}_{39}]_2\}$ | 4                               | 1 D                     | 24f        |

**Table S2.** The selected bond lengths (Å) and angles (deg) for **1**.

|                  |           |                  |           |
|------------------|-----------|------------------|-----------|
| W(1)-O(21)       | 1.707(16) | W(4)-O(14)       | 1.721(18) |
| W(1)-O(23)       | 1.837(16) | W(4)-O(13)       | 1.78(2)   |
| W(1)-O(20)       | 1.908(16) | W(4)-O(11)       | 1.857(15) |
| W(1)-O(22)       | 1.960(14) | W(4)-O(16)       | 1.929(18) |
| W(1)-O(18)       | 2.013(16) | W(5)-O(17)       | 1.70(2)   |
| W(2)-O(9)        | 1.706(14) | W(5)-O(18)       | 1.894(19) |
| W(2)-O(2)        | 1.828(15) | W(6)-O(10)       | 1.68(3)   |
| W(2)-O(20)       | 1.906(16) | W(6)-O(8)        | 1.828(13) |
| W(2)-O(7)        | 1.914(18) | W(6)-O(13)       | 1.95(2)   |
| W(2)-O(11)       | 2.006(16) | W(6)-O(12)       | 2.43(2)   |
| W(2)-O(26)       | 2.300(14) | W(7)-O(1)        | 1.844(5)  |
| W(3)-O(5)        | 1.709(17) | W(7)-O(4)        | 1.929(8)  |
| W(3)-O(4)        | 1.851(17) | W(7)-O(23)       | 1.942(16) |
| W(3)-O(6)        | 1.891(5)  | W(7)-O(3)        | 1.948(17) |
| O(21)-W(1)-O(23) | 101.8(8)  | O(20)-W(1)-O(19) | 85.1(6)   |
| O(21)-W(1)-O(20) | 103.1(8)  | O(22)-W(1)-O(19) | 73.4(8)   |
| O(23)-W(1)-O(20) | 91.5(7)   | O(9)-W(2)-O(2)   | 101.8(8)  |
| O(21)-W(1)-O(22) | 97.4(9)   | O(9)-W(2)-O(20)  | 101.7(8)  |
| O(23)-W(1)-O(22) | 91.3(8)   | O(2)-W(2)-O(20)  | 90.0(7)   |
| O(20)-W(1)-O(22) | 158.3(8)  | O(9)-W(2)-O(7)   | 101.0(8)  |
| O(21)-W(1)-O(18) | 96.9(9)   | O(2)-W(2)-O(7)   | 89.1(7)   |
| O(23)-W(1)-O(18) | 161.1(8)  | O(20)-W(2)-O(7)  | 157.0(7)  |
| O(20)-W(1)-O(18) | 86.2(7)   | O(9)-W(2)-O(11)  | 96.6(7)   |
| O(22)-W(1)-O(18) | 84.1(8)   | O(2)-W(2)-O(11)  | 161.6(6)  |
| O(21)-W(1)-O(19) | 165.6(8)  | O(20)-W(2)-O(11) | 85.2(6)   |
| O(23)-W(1)-O(19) | 89.5(7)   | O(7)-W(2)-O(11)  | 88.4(7)   |

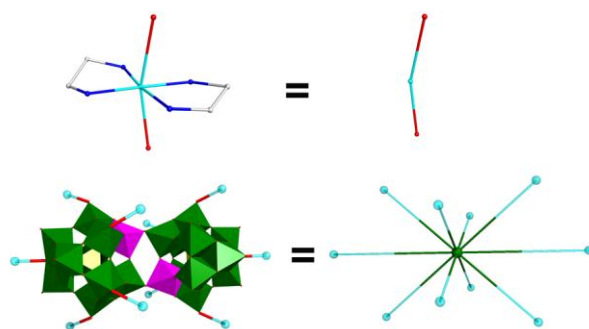

**Fig. S1.** Schematic view of [Cu(en)<sub>2</sub>]<sup>2+</sup> complex as a 2-connected node and (PW<sub>11</sub>Cu)<sub>2</sub> dimer as a 10-connected node.

**Chart S1.** Structures of dap and en molecules.

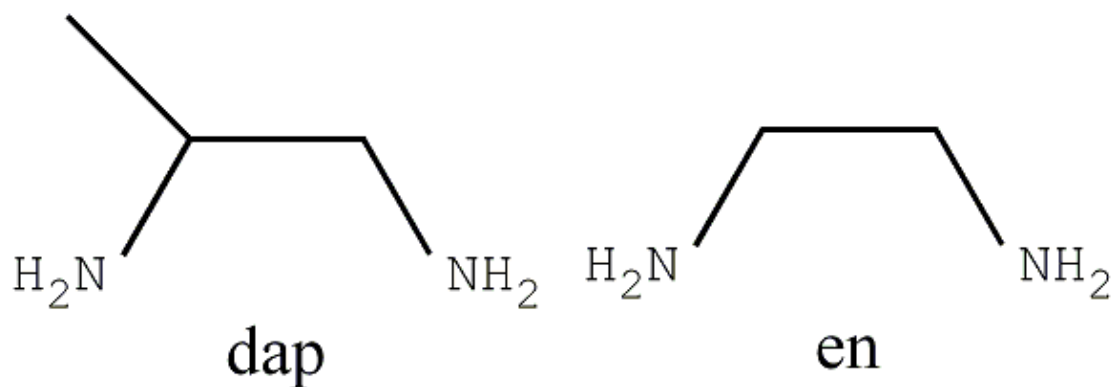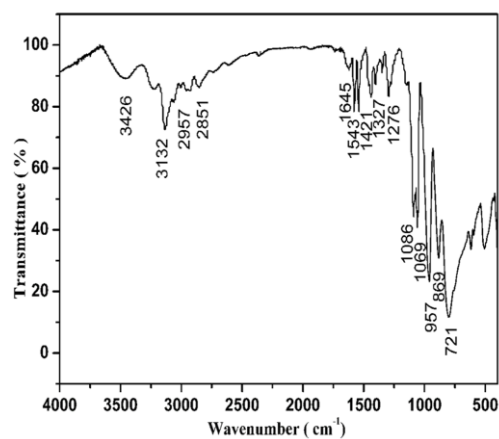

**Fig. S2.** The IR spectrum of **1**.

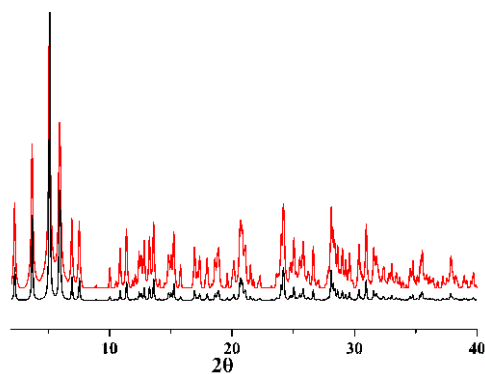

**Fig. S3.** The simulative (black) and experimental (red) powder X-ray diffraction patterns for **1**.

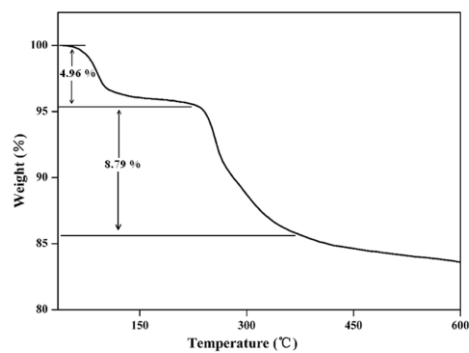

**Fig. S4.** The TG curve of **1**.

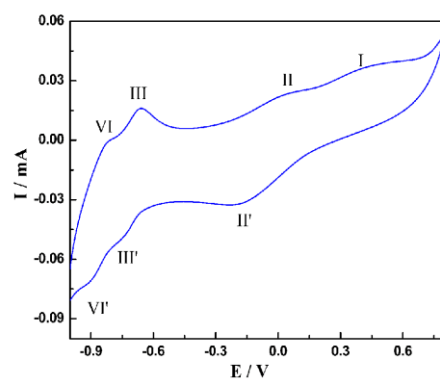

**Fig. S5.** Cyclic voltammogram for **1**-CPE in 0.2 M HAc-NaAc (pH=4.5) buffer solution at the scan rate of 50 mV·s<sup>-1</sup>.

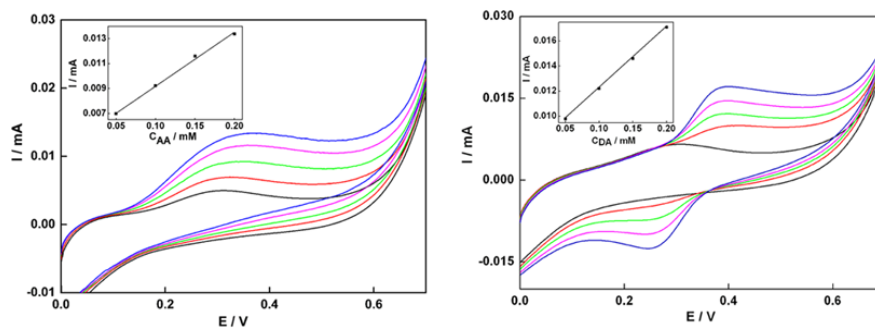

**Fig. S6** Oxidation of AA (left) and DA (right) at 1-CPE in HAC-NaAc buffer solution containing AA and DA in various concentrations (from inner to outer): 0.05, 0.10, 0.15, 0.20 mM. Scan rate:  $0.05 \text{ V}\cdot\text{s}^{-1}$ . The inset shows a linear dependence of the anodic catalytic current of wave I with AA and DA concentration.
